# Supplementary material for: PD-(L)1 Inhibitors as Monotherapy for the First-Line Treatment of Non-Small-Cell Lung Cancer Patients with High PD-L1 Expression: A Network Meta-Analysis
Source: MDPI journal article supplement (doi:10.3390/jcm10071365), 2021-03-26
Supplement: s1 [file s1]

## Supplementary Materials

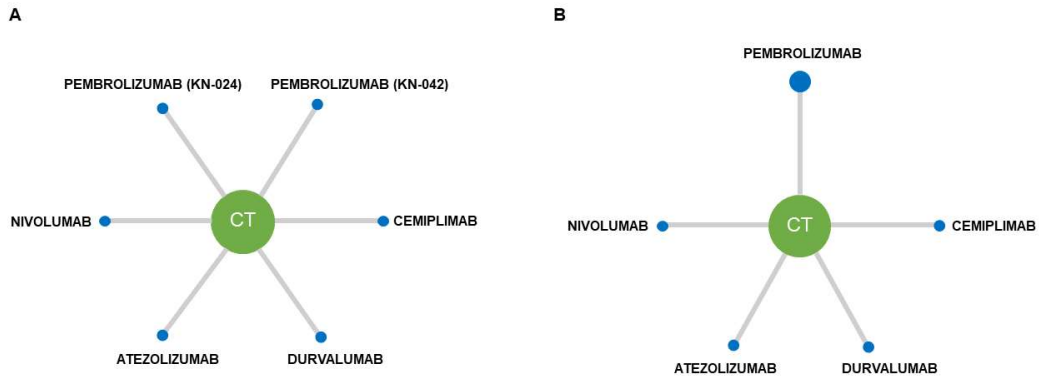

**Supplementary Figure 1.** Network of studies comparing progression-free survival (PFS) (A) and overall survival (OS) (B). CT, chemotherapy.

| Studies                                             | Weight  | RR (95% CI)          | Treat.  | Ctr.    |
|-----------------------------------------------------|---------|----------------------|---------|---------|
| KEYNOTE-024                                         | 14.92 % | 1.611 (1.180, 2.199) | 69/154  | 42/151  |
| EMPOWER Lung-01                                     | 22.44 % | 1.927 (1.466, 2.532) | 111/283 | 57/280  |
| IMpower110                                          | 17.29 % | 1.341 (0.904, 1.990) | 41/107  | 28/98   |
| KEYNOTE-042                                         | 23.44 % | 1.233 (0.993, 1.532) | 118/299 | 96/300  |
| CheckMate-026                                       | 16.92 % | 0.784 (0.510, 1.205) | 23/88   | 42/126  |
| <b>Overall</b><br>( $I^2 = 72.18\%$ ; $p = 0.006$ ) |         | 1.354 (1.04, 1.762)  | 362/931 | 265/955 |

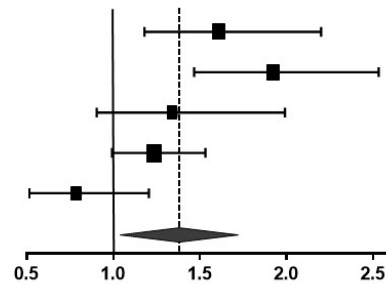

**Supplementary Figure 2.** Forest plot of pooled odds ratios for overall response rate (ORR) in patients with high PD-L1 expression ( $\geq 50\%$ ) who received first-line PD-(L)1 monotherapy *vs.* chemotherapy alone. **Treat.**, events in treatment arm/total; **Ctr.**, events in control arm/total; **CI**, confidence interval; **RR**, risk ratio.

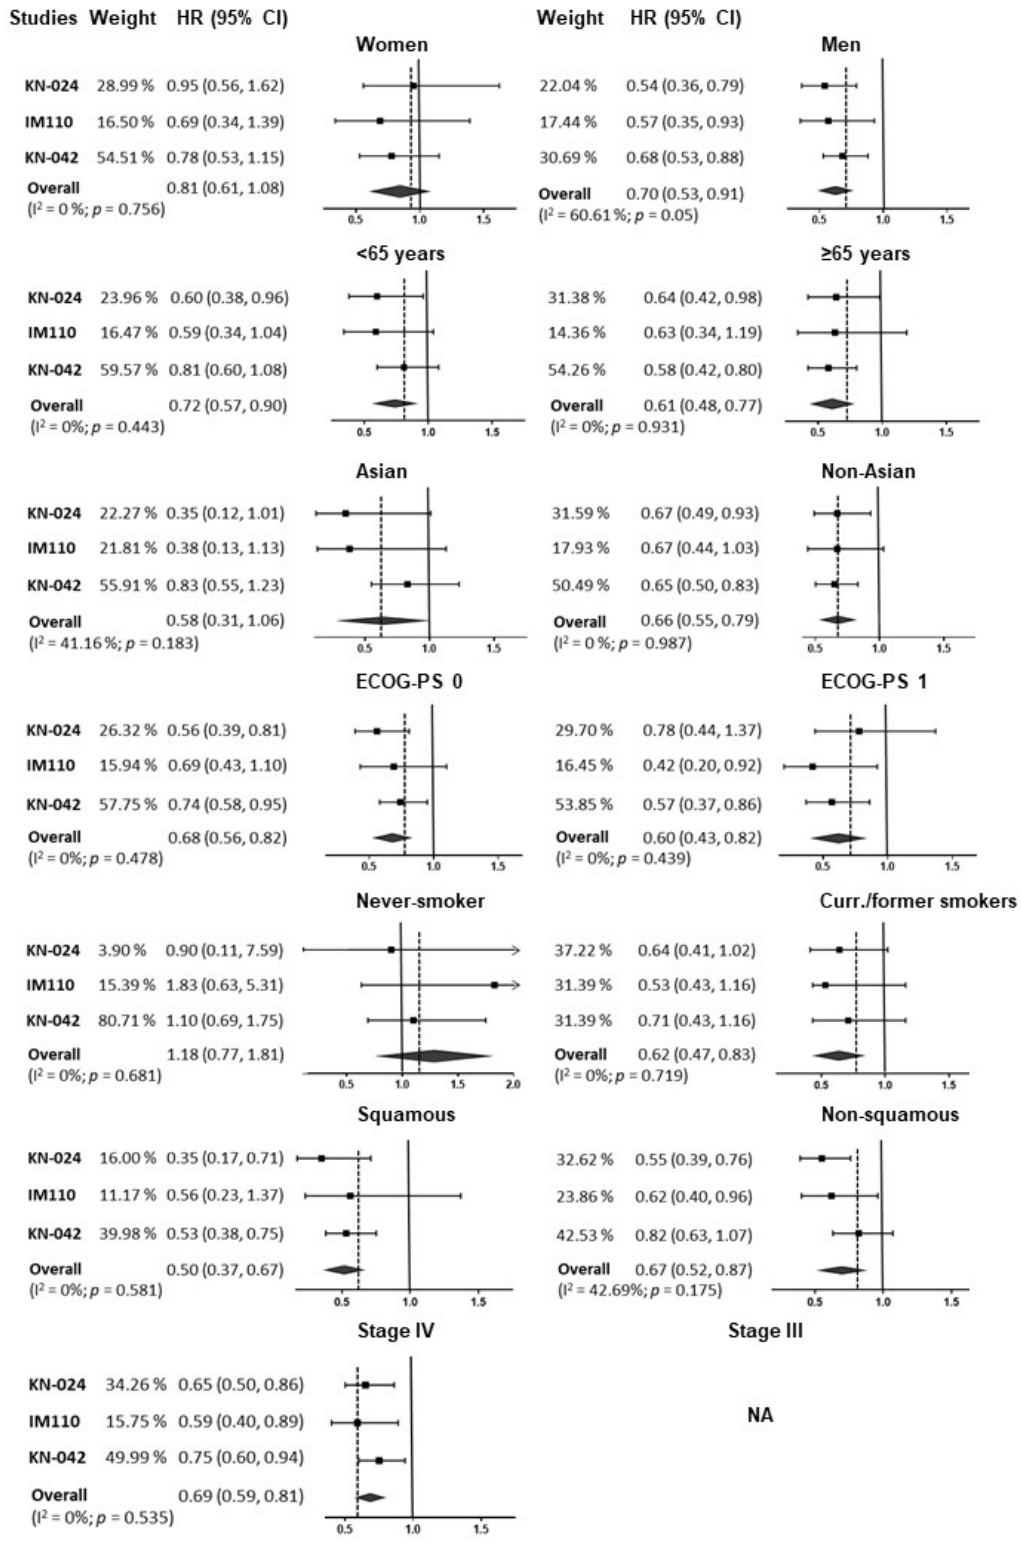

**Supplementary Figure 3.** Forest plot of hazard ratios for overall survival (OS) in the different patient subgroups. **Curr.**, current; **HR**, hazard ratio; **CI**, confidence interval. **IM**, Impower; **KN**, KEYNOTE; **CM**, CheckMate; **NA**, not applicable.

**A**

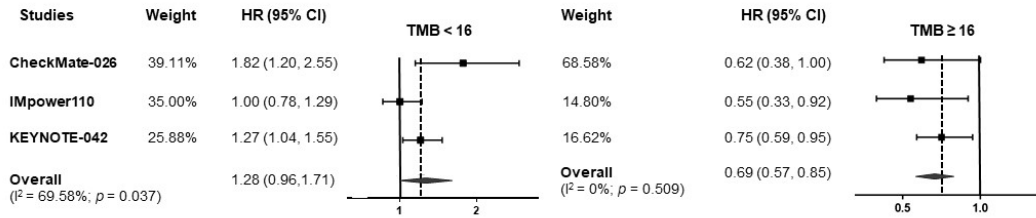

**B**

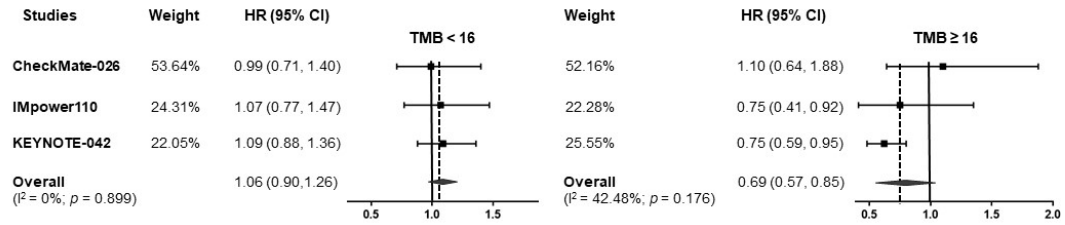

**Supplementary Figure S4.** Forest plot of hazard ratios for progression-free survival (PFS) (A) and overall survival (OS) (B) according to TMB. TMB, tumour mutational burden; HR, hazard ratio; CI, confidence interval.

**Supplementary Table 1.** Characteristics of the patient population (PD-L  $\geq 50\%$ ) of the studies included in the meta-analysis.

| Study                       | Experimental arm | Total<br><i>n</i> | Men<br><i>n</i> (%) | Median age<br>(range) | ECOG-PS<br>0/1<br>(%) | Never smoker/<br>current or former<br>smokers<br>(%) | Squamous/non-<br>squamous<br>(%) | Brain<br>metastasis<br><i>n</i> (%) | Previous systemic<br>neoadjuvant therapy<br><i>n</i> (%) | Previous systemic<br>adjuvant therapy<br><i>n</i> (%) |
|-----------------------------|------------------|-------------------|---------------------|-----------------------|-----------------------|------------------------------------------------------|----------------------------------|-------------------------------------|----------------------------------------------------------|-------------------------------------------------------|
| KEYNOTE-024<br>[10, 33, 34] | Pembrolizumab    | 154               | 92 (59.7)           | 64.5 [33-90]          | 35.1/64.3             | 3.20/96.8                                            | 18.8/81.2                        | 18 (11.7)                           | 3 (1.9)                                                  | 6 (3.9)                                               |
| EMPOWER<br>Lung-01<br>[39]  | Cemiplimab       | 283               | 248 (87.6)          | 63 [31-79]            | 27.2/72.8             | NA                                                   | 43.1/56.9                        | 34 (12)                             | 3 (1.1)                                                  | 5 (1.8)                                               |
| Impower110<br>[36]          | Atezolizumab     | 107               | 79 (73.8)           | 63 (33-79)            | 32.7/67.3             | 8.4/91.6                                             | 25.2/74.8                        | -                                   | -                                                        | -                                                     |
| KEYNOTE-042<br>[35, 57]     | Pembrolizumab    | 299               | 205 (69)            | 63 (56-68)            | 32/68                 | 21/79                                                | 36/64                            | 19 (6%)                             | 1 (<1%)                                                  | 8 (3%)                                                |
| MYSTIC<br>[38]              | Durvalumab       | 88                |                     |                       |                       | 14.70/85.30                                          |                                  |                                     |                                                          |                                                       |
| CheckMate-026<br>[37]       | Nivolumab        | 278               | 184 (68)            | 63 (32-89)            | 31/68                 | 11/88                                                | NA                               | 33 (12)                             |                                                          |                                                       |
